# Supplementary material for: Double noncovalent network chitosan/hyperbranched polyethylenimine/Fe3+ films with high toughness and good antibacterial activity
Source: PubMed Central journal article supplement — RSC Adv. 2022 Feb 14;12(9):5255–64. doi: 10.1039/d1ra08121g (PMC8981483; doi:10.1039/d1ra08121g), 2022-02-14
Supplement: RA-012-D1RA08121G-s001.pdf [file RA-012-D1RA08121G-s001.pdf]

## Supplementary Information

### Double Noncovalent Network Chitosan/Hyperbranched Polyethyleneimine/Fe<sup>3+</sup> Films with High Toughness and Well Antibacterial Activity

Kaijie Xu <sup>a</sup>, Qingyin Dai <sup>a</sup>, Kaiqiang Dong <sup>a</sup>, Ningsi Wei <sup>a</sup>, Zhiyong Qin <sup>a\*</sup>

<sup>a</sup> School of Resources, Environment and Materials, Guangxi University, Nanning, 530004, China

#### Preparation of CF-1 Films

1 g chitosan powder was dissolved in a 1% acetic acid solution and magnetically stirred for 12 h to make a uniformly solution (100 ml), the prepared Fe<sup>3+</sup> solution (5 mg/ml) was added to CHP-4 solution. The samples with Fe<sup>3+</sup> content (1 mg) were named CF-1. Then the matrix was heated and magnetically stirred in a water bath at 60 °C for 1 h and magnetically stirred at room temperature for 12 h. Finally, they were transferred into Petri dishes ( $\Phi = 12$  cm) and put in a constant temperature and humidity box at 45 °C and 50% RH until the films were dried.

Table S1. The detailed composition of the chitosan-based films

| Sample | Chitosan (g) | HPEI (g) | FeCl <sub>3</sub> (mg) |
|--------|--------------|----------|------------------------|
| CS     | 1.0          |          |                        |
| CHP-1  | 1.0          | 0.05     |                        |
| CHP-2  | 1.0          | 0.10     |                        |
| CHP-3  | 1.0          | 0.15     |                        |
| CHP-4  | 1.0          | 0.20     |                        |
| CHPF-1 | 1.0          | 0.20     | 0.5                    |
| CHPF-2 | 1.0          | 0.20     | 1.0                    |
| CHPF-3 | 1.0          | 0.20     | 2.0                    |
| CHPF-4 | 1.0          | 0.20     | 3.0                    |
| CHPF-5 | 1.0          | 0.20     | 6.0                    |
| CF-1   | 1.0          |          | 1.0                    |

## Characterization

### Thickness

The thickness (mm) of films was measured, using a digital vernier caliper (Deli, China), at three different positions in each sample to the nearest 0.001mm.

### Water vapor transmission (WVT) and water vapor permeability (WVP)

The water vapor transmission (WVT) and water vapor permeability (WVP) of films was determined by procedure for water method, using a modified ASTM E96/E96M-16-Standard Test Methods for Water Vapor Transmission of Materials<sup>1,2</sup>. The obtained dry chitosan-based films were covered on the mouth of the sample bottle and sealed by waterproof tape. The bottle was filled with more than 80% ultrapure water to produce 100% RH. Finally, the sample vial was placed in a desiccator filled with silica gel desiccant in order to provide 0% RH. The weight change of the sample vial was recorded every 6 hours, at room temperature (25 °C). Measure at least three times each time and take the average value to reduce errors. The water vapor permeability was calculated as follows:

$$WVT(gm^{-2}h^{-1}mm) = \frac{\Delta M \times d}{A \times T} \quad (1)$$

$$WVP(gm^{-2}h^{-1}Pa^{-1}mm) = \frac{WVT}{\Delta P} = \frac{\Delta M \times d}{A \times T \times P(RH_1 - RH_2)} \quad (2)$$

Where:  $\Delta M$  = the weight loss over time (g),  $d$  = the thickness of sample (mm),

$A$  = the test area or cup mouth area (m<sup>2</sup>),  $T$  = the time (h),

$\Delta P$  = the partial vapor pressure difference of the atmosphere with silica gel and pure water (Pa),

$P$  = the saturation vapor pressure at test temperature ( $3.169 \times 10^3$  Pa, 25 °C),

$RH_1$  = the relative humidity at test cup (100% RH),  $RH_2$  = the relative humidity at desiccator (0% RH).

From the results of Table S2, the WVT and WVP of CS film were better than CHP-4 film, it can be illustrated by the addition of HPEI. Large number of amino groups and hydroxyl groups exist in the CHP-4 film, and water vapor can pass through the film more easily. After adding 1 mg of iron ions, the addition of iron ions combines with the amino groups and hydroxyl groups in the internal structure to form metal coordination bonds, resulting in a decrease in the amount of water vapor passing through the film.

Table S2. Thickness, water vapor transmission (WVT) and water vapor permeability (WVP) of chitosan-based films.

| Sample | Thickness         | WVT                                        | WVP                                                                    |
|--------|-------------------|--------------------------------------------|------------------------------------------------------------------------|
| code   | (mm)              | ( $\text{gm}^{-2}\text{h}^{-1}\text{mm}$ ) | ( $\text{gm}^{-2}\text{h}^{-1}\text{Pa}^{-1}\text{mm}\times 10^{-3}$ ) |
| CS     | $0.153 \pm 0.003$ | $6.3666 \pm 0.11$                          | $2.0090 \pm 0.05$                                                      |
| CHP-4  | $0.298 \pm 0.005$ | $9.6227 \pm 0.32$                          | $3.0365 \pm 0.13$                                                      |
| CHPF-2 | $0.253 \pm 0.006$ | $6.1487 \pm 0.10$                          | $1.9403 \pm 0.04$                                                      |

The results of WVT and WVP are calculated based on the 24-hour weight loss.

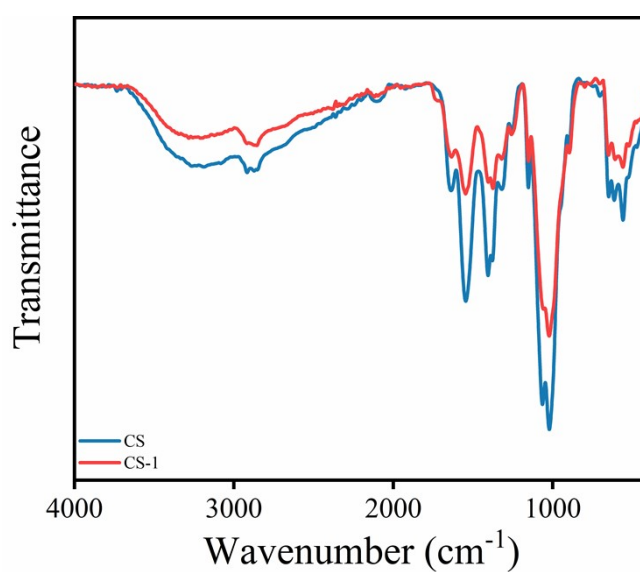

Figure S1. FT-IR spectra of CS and CF-1 films.

1. S. S. Narasagoudr, V. G. Hegde, R. B. Chougale, S. P. Masti, S. Vootla and R. B. Malabadi, *Food Hydrocoll.*, 2020, **109**, 106096.
2. R. Priyadarshi, Sauraj, B. Kumar and Y. S. Negi, *Carbohydr. Polym.*, 2018, **195**, 329-338.
